# Supplementary material for: Neuropilin-1 Expression on Regulatory T Cells Enhances Their Interactions with Dendritic Cells during Antigen Recognition
Source: PubMed Central journal article supplement (PMC2726439; doi:10.1016/j.immuni.2008.01.012), 2008-03-14
Supplement: mmc1.pdf [file mmc1.pdf]

**Table S1. Frequency of Synapse Formation among Interactions of iDCs with Treg and Naive Th Cells, as well as Th::*Nrp-1* and Th::*control* Cells**

|                    | Relative to Interactions [%] |            |                           |                             | Relative to Cells [%] |    |                   |                     |
|--------------------|------------------------------|------------|---------------------------|-----------------------------|-----------------------|----|-------------------|---------------------|
|                    | Treg<br>n=66                 | Th<br>n=43 | Th:: <i>Nrp-1</i><br>n=38 | Th:: <i>control</i><br>n=38 | Treg                  | Th | Th:: <i>Nrp-1</i> | Th:: <i>control</i> |
| organized synapses | 12                           | 9          | 21                        | 22                          | 5                     | 2  | 9                 | 5                   |
| close contacts     | 32                           | 37         | 37                        | 44                          | 13                    | 7  | 17                | 11                  |
| loose contacts     | 56                           | 54         | 42                        | 34                          | 24                    | 10 | 19                | 8                   |
| no contact         |                              |            |                           |                             | 58                    | 81 | 55                | 76                  |

**A**

|               |           |       |      |       |           |
|---------------|-----------|-------|------|-------|-----------|
| m6ph[Foxp3]   | LTR (MLV) | Foxp3 | IRES | HisD  | LTR (MLV) |
| m6p8[Foxp3]   | LTR (MLV) | Foxp3 | IRES | rCD8a | LTR (MLV) |
| m6ph[GFP]     | LTR (MLV) | GFP   | IRES | HisD  | LTR (MLV) |
| m6p8[GFP]     | LTR (MLV) | GFP   | IRES | rCD8  | LTR (MLV) |
| m6ph[control] | LTR (MLV) | bsd   | IRES | HisD  | LTR (MLV) |
| m6p8[control] | LTR (MLV) | bsd   | IRES | rCD8  | LTR (MLV) |

**B**

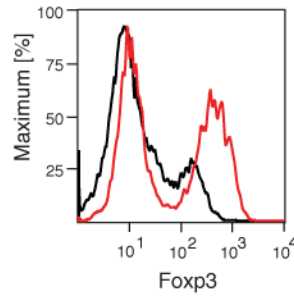

**C**

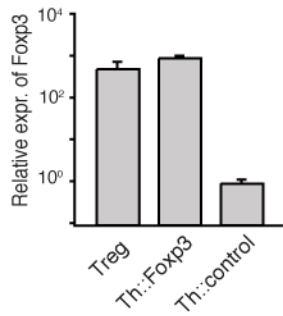

**D**

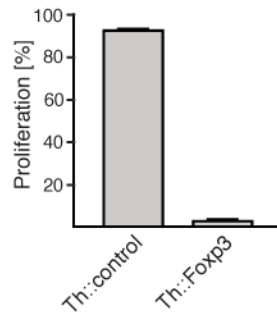

**E**

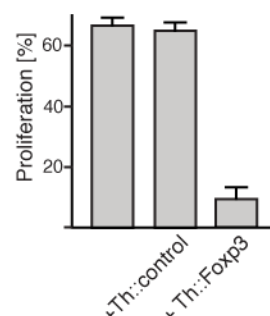

**F**

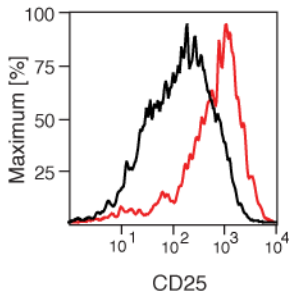

**G**

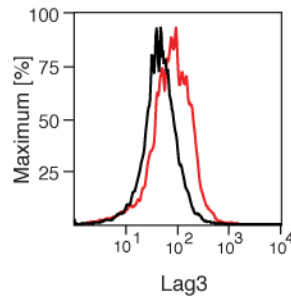

**H**

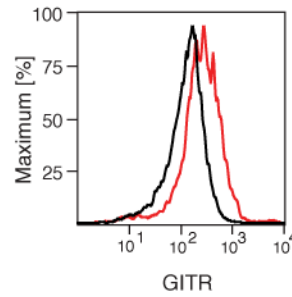

**Figure S1. Foxp3 Transduction of Th Cells**

(A) Foxp3 was amplified from Balb/c cDNA and cloned into the retroviral vectors m6ph and m6p8 carrying an IRES Histidinol-Dehydrogenase (HisD) or IRES GPI-linked ratCD8 cassette. Equivalent constructs in which the Foxp3 was replaced by GFP or blasticidine-S-deaminase (bsd) were used as controls.

(B) FACS analysis of Foxp3 expression in Th::Foxp3 cells (red) and freshly isolated CD4<sup>+</sup> cells (black).

(C) Foxp3 mRNA levels (normalized to Hprt levels) in CD4<sup>+</sup>CD25<sup>+</sup> cells and Th::Foxp3 or Th::control (bsd) cells.

(D) Proliferation of Th::Foxp3 or Th::control (GFP). The bars show the relative numbers of proliferated cells compared to an internal standard (CaliBRITE beads).

(E) Assessment of suppressive activity of Th::Foxp3 or Th::control (bsd). The percentage of cells that have proliferated after 3 days is shown.

(F-H) Flow-cytometric analysis of Th::Foxp3 cells. (F) CD25, (G) Lag3 and (H) GITR expression in Th::Foxp3 (red) or Th::control (bsd) (black) cells.

All error bars show the standard error of the mean from triplicates.

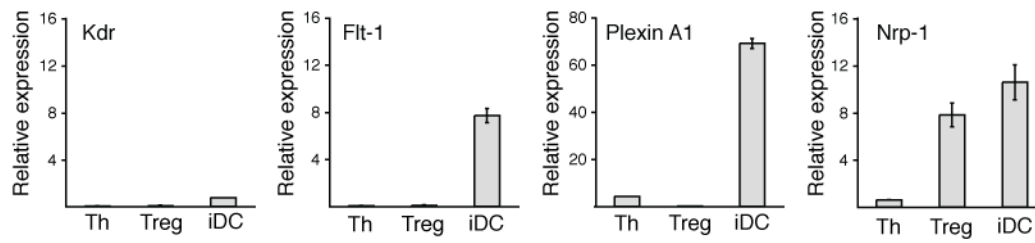

**Figure S2. Comparative Analysis of the Expression of Nrp-1 and Its Coreceptors in Th Cells, Treg Cells, and iDCs**

Relative expression of Kdr (VEGF-R2), Flt-1 (VEGF-R1), Plexin A1 and Nrp-1 in CD4<sup>+</sup>CD25<sup>-</sup> Th cells, CD4<sup>+</sup>CD25<sup>+</sup> Treg cells, and iDCs. mRNA levels were measured by quantitative real-time PCR and normalized to Hprt. All error bars show the standard error of the mean from duplicates.

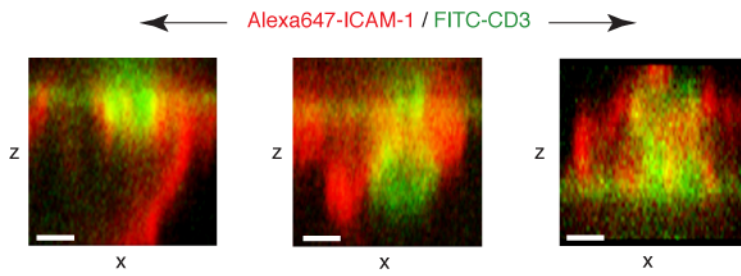

**Figure S3. Representative Examples of Organized Synapses**

Projection of zx confocal images spanning 0.5  $\mu\text{m}$  in the y direction in the area of the contact zones between DO11.10 x SCID Th cells and ova-loaded [100 $\mu\text{g/ml}$ ; 12 hr] iDCs. White scale bars on the images correspond to 2  $\mu\text{m}$ .

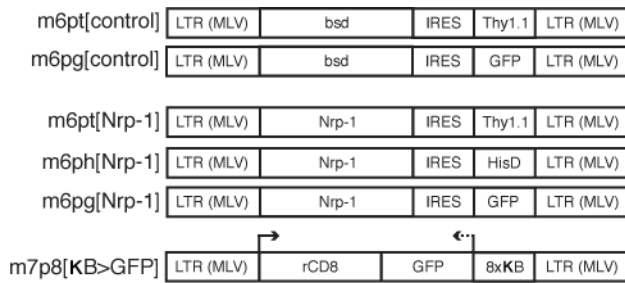

**Figure S4. Retroviral Constructs**

Nrp-1 was amplified from the image clone #6409596 and cloned into the retroviral vectors m6pt, m6ph and m6pg carrying an IRES mouse Thy1.1 marker, an IRES Histidinol-Dehydrogenase (HisD) or IRES GFP cassette. Equivalent constructs in which the Nrp-1 was replaced by GFP (see Figure S1) or blasticidine-S-deaminase (bsd) were used as controls. The m7p8[κB>GFP] is a retroviral vector on which the constitutive expression of a GPI-linked rat CD8 is driven in the ‘forward’ direction and the NF-κB-inducible expression (8 concatenated κB-sites) of GFP in the ‘reverse’ direction
